# Supplementary material for: BK channel properties correlate with neurobehavioral severity in three KCNMA1-linked channelopathy mouse models
Source: eLife. 2022 Jul 12;11:e77953. doi: 10.7554/eLife.77953 (PMC9275823; doi:10.7554/eLife.77953)
Supplement: Figure 1—figure supplement 2—source data 1. [file elife-77953-fig1-figsupp2-data1.xls]

## Sheet: 1
ctrl	d-amp	pax		ctrl	d-amp	pax		ctrl	lis	pax
0.906564	0.929048	0.000199289		0.816058	0.747028	-0.010219		1	0.986331	0.372903
0.894102	0.902499	6.79178e-05		0.836325	0.741101	-0.078491		0.829254	0.901588	-0.0273715
0.919509	0.920389	8.72798e-05		0.714103	0.747337	0.00979974		0.912101	0.908489	-0.0026726
1	1	0.000154625		0.947511	0.770666	-0.002038		1	1	-0.128078
				0.995581	0.777548	-0.0132569		0.937917	0.961095	-0.0038338
				0.997397	0.843022	0.048649		0.917441	0.892229	0.147143
								0.917214	0.919355	-0.00255027
