# Supplementary material for: BK channel properties correlate with neurobehavioral severity in three KCNMA1-linked channelopathy mouse models
Source: eLife. 2022 Jul 12;11:e77953. doi: 10.7554/eLife.77953 (PMC9275823; doi:10.7554/eLife.77953)
Supplement: Figure 1—source data 1. [file elife-77953-fig1-data1.xls]

## Sheet: 1D
V(mV)	N999S	N999S	N999S	WT	WT	WT	H444Q	H444Q	H444Q	D434G	D434G	D434G
250	0.909273	0.02064	9	0.943596	0.01341	12	0.940462	0.023419	12	0.90283	0.027119	8
240	0.934356	0.0169	9	0.94414	0.013062	12	0.919299	0.018464	12	0.926693	0.016268	12
230	0.97633	0.008309	9	0.958934	0.009622	12	0.928778	0.017742	12	0.925008	0.017363	12
220	0.947562	0.011788	9	0.954807	0.011427	12	0.919164	0.023725	12	0.9532	0.012037	12
210	0.944816	0.018924	9	0.949178	0.008942	12	0.923686	0.015896	12	0.935424	0.013453	12
200	0.989332	0.005074	9	0.964002	0.009669	12	0.873478	0.025634	12	0.962984	0.011657	12
190	0.944446	0.016635	9	0.929022	0.01394	12	0.806271	0.033567	12	0.930944	0.013453	12
180	0.931089	0.027534	9	0.899563	0.01157	12	0.736677	0.032317	12	0.93929	0.011084	12
170	0.929125	0.022159	9	0.870833	0.015289	12	0.637895	0.04377	12	0.932754	0.015624	12
160	0.942884	0.015202	9	0.835688	0.018697	12	0.531183	0.048427	12	0.906247	0.014652	12
150	0.911714	0.014019	9	0.768879	0.019897	12	0.444539	0.05371	12	0.896382	0.013821	12
140	0.90671	0.016042	9	0.681182	0.023738	12	0.299826	0.049206	12	0.870684	0.017077	12
130	0.932315	0.007356	9	0.567796	0.031378	12	0.211217	0.044495	12	0.860367	0.018745	12
120	0.893909	0.022424	9	0.418153	0.031305	12	0.106064	0.030201	12	0.815269	0.021672	12
110	0.887052	0.012564	9	0.278014	0.024204	12	0.068386	0.022607	12	0.738492	0.026827	12
100	0.868888	0.015215	9	0.164807	0.019914	12	0.035078	0.011394	12	0.645781	0.033572	12
90	0.8482	0.018844	9	0.087044	0.013545	12	0.019766	0.007222	12	0.513589	0.030006	12
80	0.811362	0.022916	9	0.035914	0.004524	12	0.012842	0.004916	12	0.373471	0.029619	12
70	0.776904	0.018818	9	0.021113	0.005273	12	0.011964	0.007404	12	0.226675	0.02658	12
60	0.685462	0.031178	9	0.015069	0.003331	12	0.009764	0.004088	12	0.135081	0.017461	12
50	0.592309	0.03819	9	0.006915	0.002635	12	0.007349	0.004983	12	0.06501	0.010266	12
40	0.47203	0.045022	9	0.00522	0.00238	12	0.010466	0.005032	12	0.033522	0.004148	12
30	0.345101	0.043544	9	0.004876	0.002705	12	0.013864	0.006128	12	0.017026	0.002794	12
20	0.214874	0.030487	9	0.005108	0.001377	12	0.008513	0.004448	12	0.009578	0.002581	12
10	0.125694	0.016703	9	0.004473	0.002185	12	0.010049	0.003687	12	0.00484	0.002382	12
0	0.059093	0.008447	9	0.004621	0.00238	12	0.008822	0.003161	12	0.003041	0.002326	12
-10	0.026659	0.008931	9	0.002391	0.001298	12	0.007831	0.004574	12	0.0039	0.00224	12
-20	0.015702	0.005225	9	0.002078	0.000951	12	0.005133	0.002838	12	-0.00062	0.000903	12
-30	0.007572	0.002146	9	0.000464	0.001182	12	0.004155	0.00293	12	0.0008	0.000547	12
-40	0.006045	0.000982	9	0.000134	0.001083	12	0.004103	0.001256	12	0.000764	0.000985	12
-50	0.002381	0.003084	9	-0.00169	0.001269	12	0.003689	0.00263	12	0.001389	0.001292	12
-60	6.9e-05	0.001094	9	-0.00135	0.000966	12	-0.00146	0.001683	12	-0.00105	0.000831	12
-70	-0.00051	0.001241	9	-0.00053	0.001438	12	0.001102	0.001907	12	-0.00029	0.000763	12
-80	-0.00027	0.00302	9	-0.00126	0.001202	12	-0.00056	0.002753	12	-0.0008	0.001399	12
-90	-0.00189	0.001478	9	-0.00347	0.001515	12	-4.3e-05	0.001056	12	-0.00013	0.001	12
-100	-0.00129	0.001126	9	-0.00121	0.001484	12	-0.00292	0.001823	12	-0.00394	0.001648	12

## Sheet: 1E
WT	N999S	H444Q	D434G
122.3	33.21	162	92.28
126.7	55.87	150.3	85.78
123.7	46	162	85.57
118.1	40.44	151	76.21
112.5	36.77	162.3	92.57
133.2	30.01	143.2	77.56
123.6	30.83	169.9	86.47
121.5	41.6	179.1	83.96
140.8	51.85	153.5	95.58
129.1		152.8	103.1
124.2		124.2	79.62
120.8		147.8	93.35

## Sheet: 1F
	WT	WT	WT	WT	WT	WT	WT	WT	WT	WT	WT	WT	N999S	N999S	N999S	N999S	N999S	N999S	N999S	N999S	N999S	N999S	N999S	N999S	D434G	D434G	D434G	D434G	D434G	D434G	D434G	D434G	D434G	D434G	D434G	D434G	H444Q	H444Q	H444Q	H444Q	H444Q	H444Q	H444Q	H444Q	H444Q	H444Q	H444Q	H444Q
100	9.10299	4.7796			5.00312		9.04406		13.0153		10.1004	6.57198	2.25997	4.54762	2.69777	2.04513	2.32625	1.5108	1.91491	2.55046	1.97484				11.8825	14.9416	8.51817	10.7131	9.57423	10.0803	7.39037	12.8502	15.1822	17.9221	7.93694	9.77934		6.45238				5.9954		1.97449	4.43802	9.04232	2.42247
110	3.80801		8.91801	5.07343	7.30938	9.05233	8.1014	16.204			7.71243		1.66684	3.28842	2.21886	2.32433	1.49949	1.68079	1.56844	1.79788	2.31621				5.29485	11.2776	6.26019	17.9685	6.92189	4.29002	7.44371	5.91148	6.99517	10.9008	6.64312	6.28463	5.38228	4.6644	5.59435	4.13708	2.64671			2.75605		7.72459	8.2509	8.37895
120	5.38095	12.7764	6.51202	9.35249	6.13504		9.14017	8.35216		9.40084	8.21038	14.9365	1.44845	2.55822	2.05199	2.24178	1.53042	1.22108	1.61416	1.76123	1.66909				5.7629	5.56348	4.29763	3.89463	4.15358	3.27845	4.8814	7.98054	6.92361	7.01322	4.6537	5.03387	11.1039	8.12515	7.55729	7.85409	3.36981	12.416	5.97779	2.05087	5.74355		22.0755	1.9044
130	5.27206		6.73442	5.03858	5.34799		15.4469	11.0503	14.6686	15.8892	5.83081	9.79593	1.29699	2.4716	1.66365	1.59605	1.05537	1.03162	1.14971	1.29985	1.39526				4.11733	4.98357	4.61787	4.22991	4.38649	2.76823	3.61354	3.87677	4.68669	5.52421	3.60753	5.38196	5.54636	12.4549	12.3081	8.18953	2.62064	15.0234		7.39488	6.85921	2.9971	19.099	6.42767
140	4.69531	6.74421	7.53917	6.04737	5.38367	11.1834	8.66225	7.9078	6.24608	7.06358	6.93266	8.86274	1.23296	1.83173	1.29614	1.46854	0.993288	0.958139	1.01002	1.09027	1.31685				2.44934	3.21472	3.23581	2.13156	2.56066	2.13165	2.92298	3.03665	3.76207	4.46884	2.88534	3.99816	9.41351	10.5708	12.4001		8.96719	5.58194	5.93428	2.90116	10.9949		4.68373	14.3857
150	2.82792	5.91713	5.73391	5.52867	4.15754	10.0785	5.78727	3.99193	7.70208	5.67458	5.11493	5.88759	0.863019	1.38487	1.27647	1.49003	0.787069	0.872545	0.820968	0.955929	0.992618				2.05177	3.47387	2.24949	2.21687	2.1829	1.87344	2.19519	2.35215	2.92818	3.6552	1.93991	3.91113	6.0114	6.73912	5.01465	9.6558	5.798	6.51639	6.86801	5.56941	10.3418	1.34236	14.4928	3.18754
160	3.50963	3.20844	4.49773	3.96527	3.16225	7.9996	4.99818	4.01283	6.49135	4.43068	4.90865	4.46843	0.726834	1.26863	1.2079	1.00353	0.896676	0.677441	0.745988	0.786481	0.802507				1.82178	3.33801	2.08908	1.75667	2.14891	1.58888	1.90264	2.27725	2.32894	2.83938	1.92917	2.41431	5.13873	7.57409	4.83461	5.47134	5.23879	10.4512	5.99591	7.21182		8.26959	5.31993	6.85643
170	2.82202	3.09414	3.83823	3.16077	2.52871	3.90663	3.51701	3.9592	5.33655	5.71345	3.88899	3.7848	0.748386	1.46579	1.02086	1.16869	0.68263	0.719525	0.59033	0.715166	0.725527				1.65117	2.50679	1.348	1.86792	1.94334	1.17237	1.63446	1.91283	1.96628	2.33626	1.46237	1.81285	5.99804	5.11625	5.15149	7.86602	5.87613	6.67019	9.94968	7.92553	5.58821	5.4156	7.9875	4.23938
180	2.52593	3.19313	3.11937	3.10237	1.92784	3.75417	2.9835	3.33958	3.80287	4.43379	2.89219	3.69819	0.634387	1.26696	0.913711	0.557324	0.54399	0.51134	0.519746	0.639889	0.594339				1.24168	1.97591	1.15048	1.74876	1.23239	1.13683	1.28514	1.70413	1.75897	1.89851	1.36	1.67159	5.18073	4.32919	4.6956	5.55231	2.79643	4.28049	6.18791	5.71159	11.3248	5.66277		4.45793
190	2.05738	2.4187	2.69547	2.91197	1.96934	2.553	2.73786	1.95058	3.20835	3.44115	2.17169	2.42451	0.490601	1.07343	0.680018	0.760638	0.588919	0.61087	0.505726	0.562342	0.48347				1.09417	1.64184	1.03355	1.28112	1.42191	0.9861	1.16586	1.47775	1.55556	1.95438	1.10874	1.65797	4.42054	3.95324	4.03951	4.85173		4.72913	4.70967	5.63833	5.69937	9.82571	3.81185	4.39262
200	1.74307	1.60522	2.11723	2.16303	1.36832	2.69322	1.73144	1.75085	2.61889	2.95257	1.7149	1.62516	0.497015	0.871399	0.590928	1.14968	0.64936	0.41428	0.465153	0.432011	0.585339				1.091	1.40091	0.996085	1.39326	1.17575	0.899338	0.995405	1.25264	1.22894	1.67057	1.07278	1.39507	4.12354	3.03305	4.92203	3.32366	4.64911	3.6707	4.63755	4.29823	2.97596	5.13396	2.1846	2.63849
210	1.5044	1.67144	2.20762	1.92133	1.25665	2.0385	1.81457	1.62086	2.55014	2.40869	1.54289	1.8419	0.399776	1.07851	0.667848	0.838024	0.381484	0.534168	0.382728	0.465721	0.44791				0.872531	1.5844	0.846692	0.915751	0.960131	0.71067	0.93332	1.31761	1.25275	1.27077	0.937026	1.17432	3.51649	2.90012	3.39052	2.33307	3.66073	5.60817	3.94034	4.70501	2.24557	3.49885	1.98757	3.25322
220	1.52266	1.72255	2.06447	1.43489	1.16493	1.38521	1.47921	1.49369	2.03828	2.42983	1.44948	1.83421	0.389847	0.951481	0.578935	1.10906	0.511951	0.482292	0.39228	0.3531	0.328653				0.787275	1.30734	0.706833	0.664816	0.938327	0.816922	0.956684	1.30516	1.21838	1.20625	0.712002	1.14121	3.39508	2.08371	4.04641	2.7315	3.08526	3.00702	3.314	3.14536	2.78421	1.91764	2.60545	2.53504
230	1.23496	1.29226	1.9251	1.42077	0.916213	1.30779	1.30125	1.31222	2.04455	1.63985	1.21092	1.3578	0.378345	0.811211	0.484191	0.690522	0.333626	0.551847	0.334049	0.383464	0.35173				0.737256	1.459	0.746122	1.16521	0.907852	0.70868	0.801998	0.842501	1.00845	1.04233	0.691941	1.37703	2.39692	2.04613	2.99019	1.83291	3.52811	2.90295	3.23566	2.9536	1.98209	1.59165	2.6332	2.03311
240	1.02736	0.88801	1.40348	1.4071	0.979818	1.0337	1.08016	1.04382	1.71631	1.53837	1.12048	1.26971	0.330423	0.714805	0.487591	0.536442	0.28024	0.277832	0.42225	0.305427	0.393432				0.661562	1.10397	0.603841	1.23835	0.68631	0.438874	0.78396	1.02123	0.95819	1.23543	0.605133	1.07924	2.30008	1.58828	1.98154	1.9918	2.20329	2.00636	2.55702	2.61696	1.59246	3.96355	1.93837	2.06256
250	1.10669	1.32211	1.30987	1.2235	0.847656	1.18886	0.947305	1.11487	1.3935	1.74001	1.14244	0.974823	0.291464	0.587431	0.37402	1.03236	0.295518	0.306877	0.613706	0.304273	0.380348				0.62636	1.17091	0.670077	0.770637	0.801245	0.545865	0.521302	1.02852					2.17646	1.68325	2.79217	2.13919	2.51573	2.23885	2.04241	2.00519	2.04529	1.6985	1.64619	1.75189

## Sheet: 1G
	WT	WT	WT	WT	WT	WT	WT	WT	WT	WT	WT	WT	N999S	N999S	N999S	N999S	N999S	N999S	N999S	N999S	N999S	N999S	N999S	N999S	D434G	D434G	D434G	D434G	D434G	D434G	D434G	D434G	D434G	D434G	D434G	D434G	H444Q	H444Q	H444Q	H444Q	H444Q	H444Q	H444Q	H444Q	H444Q	H444Q	H444Q	H444Q
-200	0.13224	0.131416	0.160231	0.154575	0.115703	0.165543	0.113454	0.153203	0.137186	0.155583	0.140514	0.115977	0.31853	0.538537	0.549746	0.391247	0.350439	0.254966	0.554498	0.269124	0.451468				0.121212	0.174602	0.181597	0.259086	0.160967	0.148579	0.183512	0.175949	0.237103	0.19203	0.234984		0.119589	0.128201	0.213862	0.130977	0.151272	0.132465	0.124319	0.119935	0.085076	0.186088	0.133474	0.135632
-190	0.137832	0.127553	0.163965	0.149512	0.146477	0.16067	0.120577	0.155381	0.178538	0.143764	0.140064	0.126682	0.365871	0.452928	0.538584	0.29488	0.381382	0.27491	0.509094	0.291302	0.411461				0.143105	0.173503	0.160644	0.189917	0.175326	0.151156	0.191857	0.201833	0.271806	0.203331	0.213554		0.125556	0.11187	0.165972	0.125482	0.115644	0.125227	0.134553	0.125363	0.087869	0.117061	0.111102	0.110929
-180	0.153263	0.14595	0.184827	0.17518	0.15042	0.158485	0.137754	0.134914	0.173724	0.131942	0.136358	0.127494	0.357762	0.523328	0.570769	0.387932	0.378697	0.258982	0.551146	0.32635	0.512042				0.166107	0.149259	0.188581	0.234203	0.175941	0.178955	0.207329	0.190563	0.262445	0.16661	0.176558		0.109739	0.143542	0.205638	0.099016	0.105854	0.159458	0.118396	0.131151	0.091861	0.14899	0.09158	0.093769
-170	0.170923	0.133771	0.188814	0.181942	0.141745	0.211816	0.133917	0.140529	0.18341	0.181556	0.140547	0.112432	0.415461	0.589751	0.60484	0.443228	0.358132	0.29654	0.603215	0.324683	0.48623				0.154452	0.188539	0.201211	0.262117	0.161128	0.19222	0.195027	0.23773	0.27706	0.183215	0.222128		0.12877	0.149207	0.187635	0.166086	0.146185	0.148315	0.122064	0.143575	0.102847	0.132296	0.123764	0.196823
-160	0.17289	0.143694	0.193974	0.17812	0.170671	0.188111	0.127943	0.184331	0.18339	0.211375	0.150719	0.118808	0.373683	0.465815	0.620446	0.384087	0.400118	0.316693	0.649255	0.354045	0.557858				0.173737	0.181122	0.202187	0.144145	0.2046	0.185978	0.19848	0.219974	0.284891	0.181512	0.215099		0.139406	0.150542	0.191357	0.166742	0.143157	0.148894	0.138512	0.140213	0.111527	0.170305	0.089439	0.146414
-150	0.206642	0.158577	0.236695	0.208156	0.15239	0.181296	0.165772	0.144414	0.18284	0.148531	0.169394	0.15371	0.414973	0.529751	0.642725	0.384194	0.512447	0.36125	0.556744	0.324753	0.568756				0.183834	0.228117	0.20492	0.272108	0.193353	0.196713	0.225253	0.236338	0.2874	0.220213	0.240835		0.151988	0.165983	0.267854	0.171446	0.110783	0.164708	0.127962	0.142771	0.127051	0.144372	0.163079	0.180416
-140	0.188208	0.189329	0.190328	0.180656	0.181568	0.253498	0.177812	0.194705	0.200431	0.165131	0.163115	0.142856	0.467863	0.476353	0.675004	0.422014	0.552943	0.362657	0.633935	0.416624	0.560055				0.196913	0.235349	0.225983	0.246609	0.231795	0.228553	0.250574	0.252339	0.324582	0.224187	0.227349		0.152329	0.134971	0.198146	0.16918	0.13886	0.177253	0.142799	0.151657	0.093305	0.125761	0.135976	0.154453
-130	0.204094	0.164516	0.239918	0.228468	0.191199	0.212856	0.182549	0.188779	0.215801	0.16601	0.177662	0.173297	0.529231	0.672874	0.790943	0.462959	0.548989	0.414465	0.647799	0.469394	0.612029				0.24558	0.258625	0.239533	0.319395	0.230788	0.251622	0.251902	0.295022	0.34547	0.280124	0.280193		0.142216	0.17313	0.209712	0.171841	0.179471	0.154683	0.136312	0.144845	0.128624	0.152306	0.153905	0.108575
-120	0.22236	0.206491	0.245808	0.222467	0.203615	0.270396	0.191531	0.210072	0.217039	0.195685	0.202962	0.187136	0.564037	0.541301	0.834186	0.562701	0.637645	0.453039	0.718081	0.466676	0.705907				0.246598	0.242953	0.290766	0.268627	0.252963	0.312755	0.304457	0.312427	0.412284	0.25298	0.366628		0.183875	0.173674	0.167314	0.209307	0.155756	0.197752	0.150781	0.161116	0.109648	0.090116	0.153776	0.10368
-110	0.203813	0.168529	0.277072	0.229662	0.216974	0.236982	0.19537	0.227761	0.255684	0.234016	0.197958	0.17406	0.653998	0.749589	0.9048	0.534436	0.78638	0.488453	0.863854	0.513529	0.713094				0.302711	0.239866	0.301515	0.408376	0.288686	0.27454	0.351469	0.337479	0.463863	0.284085	0.338896		0.213403	0.174798	0.217262	0.155002	0.16989	0.1995	0.147178	0.186705	0.121334	0.139038	0.147347	0.143371
-100	0.256961	0.213826	0.289161	0.266111	0.249831	0.309303	0.222474	0.292435	0.249427	0.210306	0.214576	0.229592	0.798044	0.851756	1.054	0.692784	0.661716	0.554658	0.87826	0.594254	0.68435				0.351852	0.284427	0.337564	0.312635	0.321614	0.317578	0.420047	0.35078	0.500982	0.382362	0.334023		0.195992	0.18284	0.281488	0.220511	0.20166	0.19325	0.171545	0.214885	0.196136	0.239389	0.171837	0.171608
-90	0.265746	0.245344	0.342137	0.288174	0.263773	0.326027	0.247868	0.282785	0.294716	0.239245	0.27343	0.259947	0.848345	0.799267	1.24162	0.542744	0.888965	0.751082	1.06542	0.70616	0.818687				0.394365	0.357707	0.442564	0.594439	0.389479	0.417454	0.426842	0.420199	0.548905	0.386851	0.413643		0.215753	0.238531	0.274971	0.196459	0.240582	0.216201	0.208165	0.19047	0.136061	0.174806	0.159467	0.159365
-80	0.31954	0.273212	0.456027	0.30246	0.28762	0.32758	0.300536	0.28059	0.316908	0.299412	0.281656	0.316058	1.03591	0.904899	1.27789	1.03215	1.1789	0.803679	1.17188	0.790246	0.915149				0.433891	0.436458	0.501467	0.595629	0.508471	0.438248	0.53579	0.452163	0.548243	0.461775	0.507976		0.228339	0.215497	0.36397	0.222139	0.232203	0.283678	0.198809	0.178615	0.181314	0.139496	0.163982	0.225465
-70	0.359458	0.307691	0.433048	0.324747	0.348089	0.373558	0.309808	0.329509	0.312753	0.309365	0.336353	0.303428	1.45746	1.00259	1.5782	0.907177	1.45104	0.978269	1.51905	0.936221	1.1123				0.55267	0.61066	0.616489	0.571314	0.472752	0.654137	0.622136	0.530386	0.696468	0.599621	0.486312		0.248316	0.254764	0.188495	0.234053	0.201999	0.271571	0.20298	0.199624	0.227827	0.26702	0.193411	0.23634
-60	0.434538	0.328698	0.507008	0.364465	0.381127	0.459753	0.331471	0.449367	0.347575	0.405507	0.354294	0.368017	1.46599	1.0731	2.06381	1.49767	1.79291	1.19201	2.3045	1.19157	1.22589				0.637387	0.589506	0.696077	0.974087	0.458447	0.685241	0.800254	0.603563	0.857668	0.546031	0.572505		0.274523	0.285667	0.347048	0.32158	0.352011	0.313371	0.191548	0.224011	0.221976	0.123415	0.211185	0.234764
-50	0.401056	0.341878	0.511908	0.406746	0.473717	0.417695	0.407876	0.489535	0.44136	0.443808	0.435037	0.3694	1.86709	1.61904	2.36574	1.34393	2.21977	1.60131	2.64226	1.50353	1.5964				0.843734	0.60685	0.812436	0.921975	0.691058	0.836007	1.00494	0.678152	0.954411	0.663051	0.634193		0.301247	0.303254	0.403261	0.414207	0.23706	0.381313	0.285065	0.20906	0.291006	0.268564	0.224369	0.192529
-40	0.499839	0.419425	0.598619	0.623111	0.538778	0.470294	0.496122	0.517233	0.47799	0.427038	0.456181	0.442598	3.15304	2.37458	2.98637	1.29544	3.7244	2.37954	2.71054	1.64164	1.81617				0.857406	1.09269	0.970084	1.07418	0.796038	1.06115	1.18965	0.931857	1.13253	0.75206	0.788		0.343776	0.342039	0.387152	0.32767	0.256426	0.395362	0.264432	0.283276	0.256018	0.310871	0.23861	0.300707
-30	0.496123	0.574678	0.84307	0.660086	0.496812	0.604765	0.549724	0.472154	0.640077	0.519303	0.642089	0.443857	4.11026	2.20419	3.97029	2.39059	2.49776	2.50688	4.66807	2.0093	1.96327				1.10704	0.966055	1.32386	1.12849	1.04167	1.1595	1.56545	0.934142	1.34471	0.959548	1.1299		0.356427	0.418009	0.518911	0.308044	0.316877	0.487796	0.294806	0.323564	0.32308	0.235817	0.373539	0.282657
-20	0.506514	0.681545	1.11359	0.662324	0.566323	0.607311	0.629751	0.553902	0.611883	0.612088	0.624879	0.701603	3.34526	7.74727	3.78363	3.01929	7.86386	3.02411	5.78827	3.22841	3.03072				1.46818	1.64223	1.21975	1.4771	1.22693	1.69053	2.25788	1.29522	1.41128	1.60988	1.24837		0.481438	0.438598	0.404208	0.553568	0.357559	0.551831	0.429239	0.347079	0.322061	0.231445	0.301168	0.262509
-10	1.20117	0.908416		1.03653	0.748672	0.686973	0.687213	0.815124	0.806015	0.577106	0.853168	0.65086	3.82479		3.61291		3.24677	5.41492	12.4795	5.77138	3.83499				1.5299	1.59897	2.04745	2.13198	1.66319	2.02225	2.4502	1.60252	1.9968	1.88133	1.2481		0.550137	0.516227	0.479897	1.46572	0.768382	0.587806	0.49663	0.427696	0.424918	0.237731	0.345502	0.393551
