# Supplementary material for: BK channel properties correlate with neurobehavioral severity in three KCNMA1-linked channelopathy mouse models
Source: eLife. 2022 Jul 12;11:e77953. doi: 10.7554/eLife.77953 (PMC9275823; doi:10.7554/eLife.77953)
Supplement: Figure 2—source data 1. [file elife-77953-fig2-data1.xls]

## Sheet: A_B_C
	Kcnma1WT/WT	Kcnma1WT/WT	Kcnma1WT/WT	Kcnma1WT/WT	Kcnma1WT/WT	Kcnma1WT/WT	Kcnma1WT/WT	Kcnma1WT/WT	Kcnma1WT/WT	Kcnma1WT/WT	Kcnma1WT/WT	Kcnma1WT/WT	Kcnma1WT/WT	Kcnma1WT/WT	Kcnma1WT/WT	Kcnma1WT/WT	Kcnma1WT/H444Q	Kcnma1WT/H444Q	Kcnma1WT/H444Q	Kcnma1WT/H444Q	Kcnma1WT/H444Q	Kcnma1WT/H444Q	Kcnma1WT/H444Q	Kcnma1WT/H444Q	Kcnma1WT/H444Q	Kcnma1WT/H444Q	Kcnma1WT/H444Q	Kcnma1WT/H444Q	Kcnma1WT/H444Q	Kcnma1WT/H444Q	Kcnma1WT/H444Q	Kcnma1WT/H444Q	Kcnma1WT/D434G	Kcnma1WT/D434G	Kcnma1WT/D434G	Kcnma1WT/D434G	Kcnma1WT/D434G	Kcnma1WT/D434G	Kcnma1WT/D434G	Kcnma1WT/D434G	Kcnma1WT/D434G	Kcnma1WT/D434G	Kcnma1WT/D434G	Kcnma1WT/D434G	Kcnma1WT/D434G	Kcnma1WT/D434G	Kcnma1WT/D434G	Kcnma1WT/D434G	Kcnma1D434G/D434G
-100	0.127157	0.42659	-0.10481	-0.07303	-0.06612	-0.2555											0.512695	-0.08347	0.197093	0.245065	-0.10808	-0.59128	-0.08976										0.035903	0.158239	-0.1946	0.194793	0.02422	0.284831	0.155979	-0.20829	-0.22195								0.908261
-90	0.082652	-0.37409	-0.45622	0.067817	0.035604	0.217645											0.512695	0.04695	-0.15259	-0.24969	-0.35604	-0.50863	-0.02394										-0.19148	-0.26373	0.008846	-0.04329	0.188918	1.25461	-0.27805	0.004844	-0.89703								0.312442
-80	-0.43233	-0.16407	0.320589	-0.00522	-0.1475	-0.14667											0.406901	-0.13042	0.095367	-0.23582	-0.31153	0.069936	-0.49067										0.017952	0.421971	0.32729	0.303011	-0.20829	-0.2238	0.637478	0.072661	0.110973								0.305176
-70	-0.22888	0.321583	0.215781	-0.15128	-0.42725	0.198719											0.170898	-0.24518	-0.05722	0.221946	-0.1653	0.139872	0.083774										-0.11369	0.55007	0.053074	0.13852	0.377837	0.04069	0.278049	-0.17439	0.795307								0.406901
-60	-0.36875	0.052503	-0.31442	0.605135	0.391642	-0.38324											0.317383	0.626002	0.076294	0.397653	-0.18438	0.101725	0.131644										0.251321	0.655563	-0.14153	0.27271	-0.14532	-0.23736	0.067817	0.169542	-0.70283								0.50136
-50	-0.01272	0.446279	0.061652	0.224317	-0.10173	0.383244											-0.236	0.067817	-0.67393	-0.20345	0.031789	-0.03179	0.065822										0.43682	0.01507	-0.62804	0.463175	0.518314	-0.65104	-0.06782	0.038752	0.971014								2.25975
-40	0.686646	0.42659	0.018496	0.902486	1.6276	0.548843											0.651042	0.406901	-0.4069	-0.30518	1.02361	0.29246	1.20275										1.5558	1.1981	2.35295	4.10797	5.72084	2.14979	0.874837	1.03178	2.32118								13.762
-30	2.02179	3.11082	1.5228	1.49719	2.96021	2.91455											0.846354	1.54935	-0.38783	3.00552	2.33332	0.063578	3.08168										5.68465	4.92802	3.72403	10.6097	13.5295	4.80821	7.99561	3.24552	13.5757								25.4894
-20	5.70297	5.60473	4.20464	6.58345	8.7026	6.02781											4.83398	5.76443	1.39872	5.97867	6.8601	2.02179	7.68325										7.81489	12.6215	6.65195	20.7217	23.5954	7.83285	13.5769	7.43563	20.2988								43.5021
-10	7.59125	9.69999	11.2329	11.0698	15.1164	11.2844											9.87956	10.4334	3.57946	9.98757	13.9745	2.17438	17.048										10.1426	16.0048	10.8183	31.8508	35.0613	18.2427	23.546	12.0665	30.7673								63.7381
0	9.93729	8.43992	16.2575	16.8812	24.0885	15.8975											16.2679	17.2307	7.48316	15.1293	21.0317	4.83195	24.456										13.0208	21.3623	15.1615	42.3826	50.7997	25.7704	30.3955	17.613	38.3504								86.6699
10	10.5921	14.1234	20.9369	19.213	29.6885	20.0422											17.3421	20.0268	9.51767	17.4551	25.5076	4.02451	30.0748										16.7308	23.9996	17.4171	51.7933	62.406	29.0663	40.6223	22.2003	48.1345								107.138
20	10.7829	16.4401	22.7186	20.4703	33.6914	23.8699											21.1019	22.7812	12.7475	20.9045	29.85	6.6185	32.57										20.8238	23.8414	23.3968	57.0181	71.4789	34.4442	43.2332	23.6535	58.4365								119.651
30	10.0454	17.6017	19.9073	18.2584	34.963	24.3809											18.7826	24.4714	15.0744	20.5254	30.6702	6.16074	31.2296										22.9361	22.4775	24.1841	60.7495	80.7117	39.2931	46.5902	20.8392	58.0851								128.145
[truncated: 63 more columns]
