# Supplementary material for: BK channel properties correlate with neurobehavioral severity in three KCNMA1-linked channelopathy mouse models
Source: eLife. 2022 Jul 12;11:e77953. doi: 10.7554/eLife.77953 (PMC9275823; doi:10.7554/eLife.77953)
Supplement: Figure 3—figure supplement 1—source data 1. [file elife-77953-fig3-figsupp1-data1.xls]

## Sheet: 1
Ri	WT	D434G-Het	D434G-HOM	H444Q-WT	H444Q-HET	H444Q-HOM	N995S WT	N995S HET	Cm	WT	D434G-Het	D434G-HOM	N995S WT	N995S HET	H444Q-WT	H444Q-HET	H444Q-HOM	RMP	D434G-WT	D434G-Het	H444Q-Het	D434G-HOM	H444Q-HOM	H444Q-WT	N995S WT	N995S HET	Tm	D434G-WT	D434G-Het	H444Q-Het	D434G-HOM	H444Q-HOM	H444Q-WT	N995S WT	N995S HET
	355	324	277	260	384	301	309	438		79	71	90	61	55	73	65	76		-71	-68	-75	-71	-66	-71	-68	-69		28	23	25	25	23	19	19	24
	284	359	371	334	496	424	388	279		92	84	81	77	57	75	58	64		-75	-68	-75	-74	-66	-69	-70	-66		26	30	29	30	27	25	30	16
	251	432	446	303	240	363	306	416		80	100	67	82	75	66	96	72		-71	-76	-68	-73	-70	-74	-70	-70		20	43	23	30	26	20	25	31
	294	341	411	263	450	306	396	282		78	67	112	66	89	57	58	46		-72	-76	-68	-74	-65	-62	-70	-68		23	23	26	46	14	15	26	25
	272	347	354	354	202	320	358	414		66	95	65	59	65	82	79	66		-72	-65	-76	-74	-68	-75	-65	-74		18	33	16	23	21	29	21	27
	511	371	325	334	298	314	394	375		65	81	74	76	75	63	50	57		-76	-75	-68	-71	-71	-68	-69	-73		33	30	15	24	18	21	30	28
	330	347	288	389	344	267	276	425		61	72	101	76	75	62	58	79		-72	-76	-72	-73	-64	-72	-69	-67		20	25	20	29	21	24	21	32
	443	349	411		321	305	301	391		81	100	80	80	84		69	59		-78	-75	-71	-77	-71		-73	-68		36	35	22	33	18		24	33
	377	336	448			389	235	287		88	77	67	81	77			75		-72	-73		-70	-71		-72	-70		33	26		30	29		19	22
	369	200	399			396	301	349		65	85	70	73	52			63		-71	-74		-70	-72		-70	-73		24	17		28	25		22	18
	479	238	399			406	309	326		71	92	65	78	71			54		-75	-77		-69	-77		-67	-68		34	22		26	22		24	23
	494	342	293				365	303		65	88	92	85	79					-63	-80		-74			-70	-65		32	30		27			31	24
	371	266	333				316	330		67	79	69	76	85					-72	-72		-72			-62	-74		25	21		23			24	28
	301	492	381				285	345		83	77	71	77	84					-80	-70		-66			-70	-75		25	38		27			22	29
	318	405	350				276	311		69	104	63	91	74					-75	-79		-68			-74	-77		22	42		22			25	23
	370	305	520				361	499		92	79	56	78	54					-74	-75		-75			-73	-66		34	24		29			28	27
	323	329	334					297		68	97	72		77					-71	-75		-74				-75		22	32		24				23
	417	358	378					236		82	75	61		64					-70	-74		-74				-65		34	27		23				15
	399	388	323					368		68	93	59		90					-67	-73		-69				-76		27	36		19				33
	313	372						406		73	83			67					-73	-76						-76		23	31						27
	342	378						282		88	95			53					-66	-73						-65		30	36						15
	385	343						367		70	85			63					-70	-73						-67		27	29						23
		309						348			87			80						-72						-73			27						28
		319									85									-71									27
		279									97									-73									27
		384									78									-73									30
		366									101									-72									37
