# Supplementary material for: BK channel properties correlate with neurobehavioral severity in three KCNMA1-linked channelopathy mouse models
Source: eLife. 2022 Jul 12;11:e77953. doi: 10.7554/eLife.77953 (PMC9275823; doi:10.7554/eLife.77953)
Supplement: Figure 3—figure supplement 2—source data 1. [file elife-77953-fig3-figsupp2-data1.xls]

## Sheet: B and F
D434G-WT	D434G-HOM	D434G-HET	N995S WT	N995S HET
2.3329	2.12383	1.74937	2.56105	2.3239
2.3633	2.27585	2.05149	2.30869	2.35611
2.03244	2.3987	2.18897	2.73331	2.5143
1.92457	2.12502	2.3552	3.18795	2.28909
2.12481	2.23158	1.79453	3.17855	2.13628
3.13882	1.83775	2.13359	2.40885	2.26867
3.24412	2.14134	1.90035	2.00616	2.67945
2.46898	2.22796	1.97361	2.40577	2.41159
1.91339	2.24066	1.71256	2.30463	2.12394
2.0244	2.31961	2.01079	2.92048	2.01079
1.94511	2.19006	1.71195	1.80219	3.46396
2.81865	2.81372	1.8585	2.2764	2.02919
2.22566	2.65546	2.04882	2.23328	2.03732
2.02658	2.73152	2.33851	1.54353	2.57559
2.01774	2.50486	1.62421	2.28124	1.86811
2.01739	2.61528	1.66994	2.32822	2.60582
2.92658	2.3223	1.82079		2.19964
2.41171	2.27933	2.32231		2.27804
2.42294	2.16472	1.76053		2.51655
2.37904		1.86428		2.66886
2.18777		2.14419		2.65969
2.98422		2.08071		2.26424
		2.06823		2.12418
		1.98074
		2.0575
		1.92117
		1.74049

## Sheet: C and G
D434G-WT	D434G-HOM	D434G-HET	N995S WT	N995S HET
-15.8088	-12.7297	-13.4573	-12.9691	-18.1908
-11.9936	-13.7664	-16.054	-9.67444	-11.9902
-20.4946	-11.7831	-12.9721	-8.45393	-10.5622
-13.1228	-10.5874	-15.5031	-11.6243	-9.48794
-9.45657	-9.85829	-15.8121	-11.6599	-12.2039
-9.30666	-15.7803	-11.8733	-16.1475	-13.5819
-11.4444	-17.2126	-13.1576	-11.9945	-10.9905
-8.47943	-17.4898	-14.1636	-10.8067	-11.47
-11.288	-11.0188	-17.8191	-11.262	-15.2586
-12.94	-8.36496	-8.88018	-12.2363	-11.8142
-10.5945	-10.9517	-16.6357	-15.5022	-12.45
-11.0194	-9.48757	-12.3921	-11.9285	-14.2478
-10.0417	-11.3224	-10.8673	-11.1034	-13.7073
-9.88398	-11.7213	-10.6846	-19.71	-8.6348
-11.9332	-11.136	-17.0028	-11.8693	-11.6903
-12.7562	-16.688	-18.403	-12.4786	-11.8424
-16.908	-13.1486	-10.4337		-11.5345
-12.1771	-18.7648	-9.49067		-9.73361
-11.531	-13.279	-9.76659		-14.3716
-11.715		-12.1136		-8.93722
-12.8429		-11.0748		-9.21823
-7.26182		-12.7836		-14.0383
		-12.209		-18.0088
		-15.6554
		-8.87572
		-11.7831
		-11.5345

## Sheet: D and H
D434G-WT	D434G-HOM	D434G-HET	N995S WT	N995S HET
0.468	0.646333	0.681667	0.59	1.012
0.518667	0.691667	0.427333	0.295	0.671333
0.315333	0.844333	0.59	0.203333	0.773
0.315333	0.376333	0.620667	0.584667	0.457667
0.315333	0.691667	0.468	0.503667	0.732333
0.396667	0.651	0.437333	0.315333	0.574
0.437333	0.600333	0.468	0.356	0.661333
0.641	0.620667	0.59	0.295	0.600333
0.585667	0.905333	0.529	0.356	0.386667
0.922	0.702	0.498333	0.274667	0.773
0.702	0.854333	0.722333	0.620667	0.478
0.468	0.600333	0.722333	0.478	0.427333
0.366333	0.457667	0.457667	0.478	0.478
0.203333	0.763	0.661333	0.356	0.661333
0.468	0.512667	0.620667	0.315333	0.559333
0.539	1.04767	0.729333	0.488333	0.752667
0.376333	0.539	0.457667		0.417
0.539	0.722333	0.620667		0.447667
0.28	0.824	0.407		0.549333
0.661333		0.702		0.478
0.346		0.274667		0.773
0.332		0.864667		0.366333
		0.557		0.708
		0.529
		0.427333
		0.58
		0.488333
