# Supplementary material for: BK channel properties correlate with neurobehavioral severity in three KCNMA1-linked channelopathy mouse models
Source: eLife. 2022 Jul 12;11:e77953. doi: 10.7554/eLife.77953 (PMC9275823; doi:10.7554/eLife.77953)
Supplement: Figure 3—source data 1. [file elife-77953-fig3-data1.xls]

## Sheet: B
	D434G WT	D434G WT	D434G WT	D434G WT	D434G WT	D434G WT	D434G WT	D434G WT	D434G WT	D434G WT	D434G WT	D434G WT	D434G WT	D434G WT	D434G WT	D434G WT	D434G WT	D434G WT	D434G WT	D434G WT	D434G WT	D434G WT	D434G WT	D434G WT	D434G WT	D434G WT	D434G WT	D434G WT	D434G WT	D434G WT	D434G-Het	D434G-Het	D434G-Het	D434G-Het	D434G-Het	D434G-Het	D434G-Het	D434G-Het	D434G-Het	D434G-Het	D434G-Het	D434G-Het	D434G-Het	D434G-Het	D434G-Het	D434G-Het	D434G-Het	D434G-Het	D434G-Het
0	0	0	0	0	0	0	0	0	0	0	0	0	0	0	0	0	0	0	0	0	0	0									0	0	0	0	0	0	0	0	0	0	0	0	0	0	0	0	0	0	0
20	0	0	0	0	0	5	1	3	0	3	4	6	4	0	0	0	2	0	1	0	0	5									0	0	3	2	0	0	0	1	0	0	0	0	0	4	0	0	1	4	2
40	2	3	0	4	9	11	9	9	4	11	11	12	9	3	4	4	6	7	6	5	4	13									6	3	7	6	2	6	5	7	5	0	0	3	3	9	5	8	6	11	9
60	6	8	5	10	13	17	14	15	7	20	17	18	13	6	8	6	9	10	9	7	7	19									11	6	10	9	5	9	12	12	7	7	1	6	6	16	8	14	9	15	13
80	8	11	8	14	18	24	18	20	9	28	25	24	18	8	12	8	12	12	11	9	9	23									15	8	15	12	8	14	15	15	9	11	4	7	10	22	11	19	12	20	18
100	10	13	11	18	21	29	22	24	12	32	31	29	21	10	16	9	14	14	14	13	12	27									18	11	22	15	11	18	20	19	11	16	6	10	14	27	14	24	15	26	22
120	12	19	13	21	24	34	25	28	15	36	35	33	25	13	20	13	20	18	19	17	16	30									23	16	26	20	14	22	23	26	14	20	8	15	17	32	19	28	20	30	27
140	16	21	15	27	27	38	29	33	21	42	40	39	27	16	23	14	23	24	22	21	18	34									26	19	31	25	16	27	26	28	18	24	9	18	23	37	23	31	24	35	31
160	16	25	16	29	30	42	31	37	25	47	46	43	31	19	27	18	25	28	25	27	21	37									30	23	33	29	22	31	29	34	21	28	11	23	27	40	26	35	27	40	35
180	21	29	18	32	32	44	34	39	30	50	49	47	34	22	30	21	28	33	28	29	25	40									33	25	38	33	24	34	32	37	25	31	13	27	30	44	31	38	30	44	39
200	23	32	20	36	34	46	36	42	33	52	52	49	34	26	33	25	28	36	31	34	26	42									37	28	39	35	27	38	34	40	28	34	16	31	35	46	34	41	31	46	42
220	25	34	19	38	35	43	38	44	38	56	55	50	36	29	35	28	18	40	33	36	30	43									39	31	42	39	30	41	36	43	33	37	21	34	37	50	37	45	34	49	47
240	26	36	19	40	38	28	38	46	42	56	57	51	38	31	37	31	13	43	34	39	33	42									40	32	43	40	32	43	38	45	35	41	25	37	40	51	40	46	37	51	49
260	27	37	20	43	39	16	31	47	44	56	58	37	35	35	39	32	11	45	38	41	33	35									44	35	44	39	33	46	36	46	37	45	29	39	42	40	42	48	40	52	51
280	28	38	17	45	41	12	11	47	45	46	59	20	32	37	41	36	7	47	38	41	35	20									46	36	45	22	34	47	28	49	39	47	31	42	44	20	44	51	42	48	52
300	28	39	16	46	42	9	10	32	48	38	60	12	23	39	31	38	7	48	38	41	34	12									48	37	43	16	37	48	20	50	43	50	34	44	44	10	47	53	43	13	54
320	25	39	14	47	42	8	7	18	49	32	60	10	11	40	31	40	5	49	34	30	36	7									50	38	33	10	38	48	17	51	44	51	36	45	46	11	47	54	45	11	56
340	19	39	13	48	42	7	8	11	50	20	59	6	9	41	19	41	7	48	32	17	34	5									52	38	31	9	37	45	12	48	45	23	38	47	47	8	48	55	45	10	58
360	14	32	14	48	40	6	7	10	51	16	46	6	5	43	15	42	10	43	12	14	17	6									52	37	22	9	37	35	10	38	43	18	41	47	48	7	48	56	46	8	58
380	11	29	10	48	36	5	6	9	51	11	27	5	7	44	12	41	3	23	8	11	9	6									52	29	18	6	37	29	8	23	41	12	43	44	48	7	39	56	43	8	58
400	10	22	7	47	25	4	6	7	50	11	14	5	10	45	11	33	2	16	8	10	7	4									52	25	17	5	32	22	7	17	24	13	43	33	47	6	28	56	38	7	58
[truncated: 191 more columns]

## Sheet: C
Kcnma1WT/WT	Kcnma1WT/N999S	Kcnma1WT/WT	Kcnma1WT/D434G	Kcnma1D434G/D434G	Kcnma1WT/WT	Kcnma1WT/H444Q	Kcnma1H444Q/H444Q
0.2317	0.255	0.1133	0.1992	0.165	0.1867	0.2625	0.1658
0.2	0.26	0.1667	0.15	0.2225	0.1167	0.2175	0.1558
0.1683	0.295	0.1175	0.2217	0.3133	0.1917	0.1292	0.2183
0.1992	0.2433	0.1992	0.1825	0.2475	0.2392	0.2333	0.265
0.2483	0.2992	0.1992	0.1383	0.325	0.2325	0.1333	0.18
0.1958	0.1883	0.2708	0.205	0.2208	0.2667	0.2042	0.2225
0.1642	0.205	0.2067	0.1983	0.1733	0.1675	0.2042	0.1067
0.1425	0.2208	0.2375	0.2183	0.2275		0.18	0.1817
0.1058	0.1	0.1583	0.1333	0.39			0.2067
0.1283	0.2817	0.3058	0.1942	0.3025			0.1842
0.15	0.2142	0.295	0.0767	0.3258			0.2458
0.1667	0.2042	0.27	0.145	0.2175
0.2325	0.2058	0.1942	0.1775	0.2158
0.1392	0.2567	0.1233	0.2633	0.2842
0.1617	0.1725	0.1808	0.1725	0.2283
0.1967	0.265	0.1125	0.2358	0.265
	0.1992	0.1633	0.1758	0.1875
	0.2283	0.175	0.2517	0.2067
	0.1292	0.1617	0.2267	0.225
	0.1792	0.1675	0.2308
	0.2792	0.1392	0.1725
	0.2417	0.2308	0.23
	0.1933		0.1592
			0.1892
			0.2
			0.25
			0.2183

## Sheet: D
WT	N999S/	WT	D434G/	D434G/	WT	H444Q/	H444Q/
	WT		WT	D434G		WT	H444Q
41	47	28	52	44	46	55	37
44	49	39	38	41	29	37	38
34	57	20	45	52	37	35	37
40	47	48	40	54	41	37	44
39	60	42	38	60	49	35	32
41	41	46	48	49	50	34	39
34	46	38	38	43	40	37	31
37	48	47	51	46		36	33
29	33	51	45	66			41
26	60	56	51	54			34
37	40	60	43	59			47
40	46	51	47	48
45	51	38	48	48
36	48	45	51	47
37	47	41	48	51
42	51	42	56	45
	45	28	46	46
	47	49	52	41
	40	38	58	46
	42	41	52
	48	36	41
	47	43	52
	46		41
			47
			49
			56
			54
