# Supplementary material for: BK channel properties correlate with neurobehavioral severity in three KCNMA1-linked channelopathy mouse models
Source: eLife. 2022 Jul 12;11:e77953. doi: 10.7554/eLife.77953 (PMC9275823; doi:10.7554/eLife.77953)
Supplement: Figure 4—source data 1. [file elife-77953-fig4-data1.xls]

## Sheet: A
WT	WT		WT/WT	WT/N999S		WT	WT		WT	KO
/WT	/D434G					/WT	/H444Q
168	79		266.75	48		556	342		401	155
137	258.5		133	81		735	623		247	118
111	57		236	222		220	235		122	188
104	46		308	44.25		137	215		189	227
237	102		83.25	67.75			79.25		259	37
166.75	89		170.5	48.75			156.75		131	96
490.75	78		9.25	58			177.75		286	196
142			183.5	22.25					245	356
327			125	22.5					31	145
294			73	78.75					277
123			92.25	36.5					183
			381	108					122
			473	145					300
			416.75
			142.5
			130.25
			163
			1907

## Sheet: B
WT/WT	WT/N999S	WT/WT	WT/D434G	WT/WT	WT/H444Q	WT	KO
2868.36	4699.02	11592.1	3464.98	1445.37	3693.89	4930.42	6453.91
1601.29	1389.56	3730.07	10286.7	2635.4	817.326	4905	15065
2450.87	6150.9	3152.47	6096.67	5249.74	2026.99	3826.86	2845.33
3061.63	6756.74	1665.27	1099.32	6870.27	11595.1	6120.78	2197.09
3134.92	2280.1	4581.07			2009.6	6393.94	4215.81
1128.84	2733.44	1884.54			3597.23	2917.2	2283.89
2836.55	4310.55					2132.88	8178.41
2021.67						764.016	821.125
1681.66						3450.2	7831.61
2286.68							9180.06
2194.59
