# Supplementary material for: BK channel properties correlate with neurobehavioral severity in three KCNMA1-linked channelopathy mouse models
Source: eLife. 2022 Jul 12;11:e77953. doi: 10.7554/eLife.77953 (PMC9275823; doi:10.7554/eLife.77953)
Supplement: Figure 5—figure supplement 1—source data 1. [file elife-77953-fig5-figsupp1-data1.xls]

## Sheet: A
Saline	d-amp
29	5
0	8
2	5
1	19
1	18

## Sheet: B
Saline	d-amp
0.49484	0.59897
1.7267	1.00338
1.25613	0.61156

## Sheet: C
	WT	WT	WT	WT	WT	WT	WT	N999S/	N999S/	N999S/	N999S/	N999S/	N999S/	N999S/
								WT	WT	WT	WT	WT	WT	WT
Saline	0.061453	0.233898	0.416382	0.506757	0.233898	0.329787	0.269504	0.222707	0.044	0.025641	0	0.169903	0.215596	0.036667
d-amp	0.259386	0.520134	0.237762	0.167247	0.212329	0.583893	0.42	0.384906	0.105263	0.155172		0.610714	0.288618	0.26

## Sheet: D
	WT	WT	WT	WT	WT	WT	WT	N999S/	N999S/	N999S/	N999S/	N999S/	N999S/	N999S/
								WT	WT	WT	WT	WT	WT	WT
Saline	128.539	16.9448	23.2755	17.9143	17.4922	38.4669	30.9951	79.828	62.3386	114.577	215.641	82.7981	79.797	112.81
d-amp	23.445	13.0438	30.2133	27.277	23.1588	13.1383	13.421	63.3703	54.504	21.1952		48.9519	55.1376	25.2429
