# Supplementary material for: BK channel properties correlate with neurobehavioral severity in three KCNMA1-linked channelopathy mouse models
Source: eLife. 2022 Jul 12;11:e77953. doi: 10.7554/eLife.77953 (PMC9275823; doi:10.7554/eLife.77953)
Supplement: Figure 5—source data 1. [file elife-77953-fig5-data1.xls]

## Sheet: A
	WT	WT	WT	WT	WT	WT	WT	WT	WT	WT	WT	N999S/	N999S/	N999S/	N999S/	N999S/	N999S/	N999S/	N999S/	N999S/	N999S/	N999S/
												WT	WT	WT	WT	WT	WT	WT	WT	WT	WT	WT
Control	5	11	28	23	11	43	12	13	10	15		50	17	43	42	23	28
Stress	95	27	9	61	76	43	51					139	161	199	91	84	127	160	96	59	117	90

## Sheet: B
	WT	WT	WT	WT	WT	WT	WT	WT	WT	WT	WT	N999S/	N999S/	N999S/	N999S/	N999S/	N999S/	N999S/	N999S/	N999S/	N999S/	N999S/
												WT	WT	WT	WT	WT	WT	WT	WT	WT	WT	WT
Control	0.054237	0.041522	0.091912	0.079422	0.089965	0.066148	0.055556	0.013937	0.027586	0.021053		0.044	0.021201	0.035019	0.046512	0.036101	0.044118
Stress	0.097561	0.25641	0.257732	0.07113	0.026786	0.396887	0.273092					0.062201	0.078704	0.150289	0.078571	0.080745	0.093525	0.138614	0.093137	0.352697	0.04918	0.052381

## Sheet: C
	WT	WT	WT	WT	WT	WT	WT	N999S/	N999S/	N999S/	N999S/	N999S/	N999S/	N999S/
								WT	WT	WT	WT	WT	WT	WT
Saline	121	5	7	4	5	18	15	71	50	105	216	94	82	159
d-amp	7	2	14	13	8	2	3	35	53	10	20	54	13

## Sheet: D
WT	D434G/	D434G/
	WT	D434G
21	93	86
12	81	96
75	29	68
45	115	164
114	51	93
44	33	107
101	70	94
25	50
95	58
37	42
90	59
28	93
21	56
40	64
	21
	53
	90
	92

## Sheet: E
WT	H444Q/	H444Q/
	WT	H444Q
120	58	10
92	34	12
22	21	59
	57	28
	80	4
	38	11
	48	0
	75	11
	18
	63
	12

## Sheet: F
WT	Het	KO
42	57	2
91	31	22
51	100	76
23	26	24
40	27	18
52	28	19
28	67	29
80	36	28
27
142
22
