# Supplementary material for: BK channel properties correlate with neurobehavioral severity in three KCNMA1-linked channelopathy mouse models
Source: eLife. 2022 Jul 12;11:e77953. doi: 10.7554/eLife.77953 (PMC9275823; doi:10.7554/eLife.77953)
Supplement: Figure 6—figure supplement 1—source data 1. [file elife-77953-fig6-figsupp1-data1.xls]

## Sheet: Ai
WT	D434G/
	WT
5550.78	5690.95
5603.9	4591.16
5580.29	4889.39
6953.78	6342.19
6826.34	5673.43
5961.52	2404.67
7709.78	4947.12
5595.41	9630.68
6436.62	8053.2
8257.37	6227.29
7911	9061.7
3414.83

## Sheet: Bi
WT	D434G/
	WT
52.5	60
55	44.5
56	39
65.5	51.5
62	44.5
64.5	45.5
65.5	46
57.5	62
58	57.5
63.5	50.5
59	62
55

## Sheet: Ci
WT	D434G/
	WT
4.94	5.23
4.22	2.7
4.68	3.9
4.1	3.96
5.35	3.81
5.03	7.68
5.32	4.27
3.7	2.34
6.81	2.92
4.61	2.29
3.78	1.93
7.74

## Sheet: Di
WT	D434G/
	WT
43.5	46.5
47.5	57.5
53	39
46.5	42
45.5	37.5
51	55
37	49.5
57.5	31
35	38.5
35.5	42.5
36.5	42
49

## Sheet: Aii
WT	H444Q/	H444Q/
	WT	H444Q
3957.44	17725.6	5227.46
9261.99	5255.13	3092.07
5991.03	3080.45	4953.76
	6114.41	4426.64
	3038.76	4504.29
	3118.99	3983.63
		6225.63

## Sheet: Bii
WT	H444Q/	H444Q/
	WT	H444Q
62	44.5	45
65	55.5	54.5
52	45	46
	43.5	49.5
	135	44
	57	53.5
		49.5

## Sheet: Cii
WT	H444Q/	H444Q/
	WT	H444Q
2.82	3.74	8.3
2.95	5.02	6.34
4.44	5.97	4.16
	6.4	4.25
	7.69	7.83
	10	8.54
		7.59

## Sheet: Dii
WT	H444Q/	H444Q/
	WT	H444Q
30	56	55
48	25	58
72	48	60
	39	40
	37	34
	52	29
		28

## Sheet: Aiii
WT	Het	KO
4553.53	6221.57	317.598
4097.06	2962.04	384.549
5216.4	6177.31	1333.65
2218.95	8774.9	1832.18
5893.46	5052.43	2254.36
6003.01	6414.49	1856.9
9839.09	2185.01	751.576
2171.18	6335.37	1192.38
7277.65	3512.76	650.689
	4832.4	2358.56
	4258.25
	7133.05
	8562.98
	8653.91
	6383.87

## Sheet: Biii
WT	Het	KO
39.5	48	17.5
44.5	45	23.5
65.5	65	36
49	59.5	42.5
54.5	58	40.5
53.5	68.5	39
73	54.5	28.5
42.5	46.5	35
57	38	26
	47	48.5
	44.5
	58.5
	57
	64.5
	63

[truncated: 2 more sheets: Ciii, Diii]
