# Supplementary material for: BK channel properties correlate with neurobehavioral severity in three KCNMA1-linked channelopathy mouse models
Source: eLife. 2022 Jul 12;11:e77953. doi: 10.7554/eLife.77953 (PMC9275823; doi:10.7554/eLife.77953)
Supplement: Figure 6—figure supplement 2—source data 1. [file elife-77953-fig6-figsupp2-data1.xls]

## Sheet: Ai
WT	D434G/	D434G/
	WT	D434G
25.3333	43.6667	61.3333
11	15	42.333
88	120	120
49	42.3333	24.3333
45	120
26	120
120	120
26	74.6667
120	51
120	19.6667
120	120
50.6667	71
71.6667	120
104.333	19.3333
120

## Sheet: Aii
WT	H444Q/	H444Q/
	WT	H444Q
120	120	28.6667
120	116.33	28.3333
88.6667	120	33
	120	9
	120	21
	16	106
	118.333	38.6667
	54.6667	120
	19.3333
	100.333
	120
	43
	92.6667
	120

## Sheet: Aiii
WT	Het	KO
100.333	110	5.33333
69	22.3333	13
31.3333	120	18
108	14.6667	25.6667
76.6667	120	44.6667
90	120	50
82.6667	120	19
44	120	10.6667
120	68.6667	24
59.6667	85.3333	9
	77.6667
	57
	115.333
	66.6667
	24.3333
	38.6667
	81

## Sheet: Bi
	WT	WT	WT	WT	WT	WT	WT	WT	WT	WT	WT	WT	WT	WT	WT	WT	WT	WT	WT	WT	WT	D434G/WT	D434G/WT	D434G/WT	D434G/WT	D434G/WT	D434G/WT	D434G/WT	D434G/WT	D434G/WT	D434G/WT	D434G/WT	D434G/WT	D434G/WT	D434G/WT	D434G/WT	D434G/WT	D434G/WT	D434G/WT	D434G/WT	D434G/WT	D434G/WT	D434G/D434G	D434G/D434G	D434G/D434G	D434G/D434G	D434G/D434G	D434G/D434G	D434G/D434G
	1	3	5	6	7	8	9	14	16	17	18	2	3	4	5	17	18	1	3	9	19	2	4	10	11	12	9	14	16	17	1	6	15	16	2	5	8	10	17				4	6	7	18
1	27.3333	41	67.6667	55.6667	56.3333	75.3333	68	66.6667	40.6667	80	75.6667	40.6667	41.6667	21.6667	51.3333	54.6667	37	36	48.3333	30	54	93.6667	43	88	75	34.3333	57.6667	60.3333	95.3333	110.333	91.6667	52	62.3333	11.3333	28.6667	23	40.6667	57.3333	35.6667				52.667	57.667	38.333	33
2	49.3333	47.3333	54	61.6667	52	117.667	122	78.6667	98.6667	88.6667	113.667	76	54.6667	46	62	45	92.3333	63.6667	90.6667	62.3333	60.6667	74.6667	46.6667	74	81.6667	59	93.6667	82.3333	90.3333	141.667	84.6667	59	75.3333	74.3333	38.6667	34.6667	25.3333	69	65				33	28	28.333	38.333
3	55.3333	53	78	76.3333	42.6667	94.3333	97.6667	55	98	92.3333	78.3333	77	67	92.3333	60.3333	87.3333	61.3333	76.6667	82	137.667	106.667	61	24	71.3333	92.3333	68.3333	111	105.667	126.333	120.333	90.3333	41.6667	72.6667	89.3333	45	36.3333	10.3333	83	59.3333				51.333	34	26	76.333
4	67.3333	77	86	84.6667	48	110.333	121.333	49	100	111	83.3333	80.3333	14	92.3333	70.3333	90.6667	92.6667	71	65.3333	106.333	102.667	93.6667	55.3333	75.6667	73	75.6667	124.667	93.3333	112.667	162.667	68.3333	71	79.6667	110.333	62.6667	38.6667	24.3333	119.333	44.6667				40.333	19.333	33.333	52.333
5	75	100.333	74.3333	103.667	43.6667	87	106	45	83	105.667	61.6667	80.3333	61	97.6667	84.6667	117.667	79	63.3333	44.6667	127	99	130	43.6667	94.6667	62	93	94.6667	123.333	119	138.667	111.333	49.6667	82	88.3333	62.3333	47	33.3333	85.6667	54				55.667	14.667	32	59.333
6	69.6667	80.6667	79.3333	70.6667	25.6667	101.667	122.333	72.3333	91.6667	93	79.3333	71	57	103.333	106	67.3333	100	73.6667	60.3333	106	143	103.667	61.6667	60.6667	63	93.6667	80	121	133.333	147.333	93	45.3333	58.6667	94.3333	41	52.6667	31.6667	86	68.6667				39	13	29.333	33.667
7	76.3333	103.667	51	61.3333	59.3333	119.333	152.333	80.3333	109.333	96	83.3333	77	72	163	104.667	89.3333	110.667	61.6667	72	99.6667	152.667	150.667	52.3333	61.6667	48.3333	108.333	121.333	119.333	149.667	185.333	114	116	116.333	82	65	55	33.6667	125.333	82.3333				39.333	19.667	42.667	55
[truncated: 14 more columns]

## Sheet: Bii
WT	WT	WT	WT	WT	WT	WT	WT	WT	WT	H444Q/WT	H444Q/WT	H444Q/WT	H444Q/WT	H444Q/WT	H444Q/WT	H444Q/WT	H444Q/WT	H444Q/WT	H444Q/WT	H444Q/H444Q	H444Q/H444Q	H444Q/H444Q	H444Q/H444Q	H444Q/H444Q	H444Q/H444Q	H444Q/H444Q	H444Q/H444Q	H444Q/H444Q	H444Q/H444Q
8	15									2	3	5	9	11	11	12	13	14	15	1	4	6	7	10	16	16
99.6667	69.6667									55	43.6667	35	35	15	36	76	14	67.3333	108	26.6667	31.6667	44.6667	10.6667	30	43	3.66667
95.6667	43.3333									43.6667	30	43.6667	27	22.6667	79.6667	48	39.3333	42.3333	93	63.6667	76.3333	59.3333	25	87.3333	36	31
71.3333	44.6667									85.6667	62.6667	40.6667	38.3333	43.3333	90.6667	100	52.6667	75.6667	54	41.3333	82.3333	91.6667	75.6667	85.3333	103.667	59.3333
60.3333	79									72	69	56.3333	29	39	73.6667	91.3333	37.3333	55.6667	77	62.6667	82.3333	46.3333	48.6667	82	81.6667	58
81.6667	94.6667									95.3333	56.6667	83.3333	43	28	92.3333	80.6667	63.6667	68.6667	79	41	61.3333	78.3333	31.3333	51.3333	97	90.6667
73	85									72.6667	88.3333	82.3333	42.3333	59.6667	76	68.6667	67.6667	84	87.3333	75.6667	92.3333	59	29.3333	70.3333	140.667	102.667
102.667	84									95	96	79.3333	37	45	85	103	56	93	112	74.6667	143	51	55.6667	66	83.6667	117.333

## Sheet: Biii
	WT	WT	WT	WT	WT	WT	WT	WT	WT	WT	WT	WT	WT	Het	Het	Het	Het	Het	Het	Het	Het	Het	Het	Het	Het	Het	KO	KO	KO	KO	KO	KO	KO	KO	KO	KO	KO	KO	KO
	7	11	12	13	7	12								8	9	15	16	3	5	6	8	9	10	11	13	14	6	10	14	1	2	4
1	31.3333	30.3333	85.3333	122.333	61.3333	43								41.667	44	24.333	46.667	13	10.333	32.667	40	34.667	51.333	59.667	61.333	56.667	5	0.666667	4	0	0	1.66667
2	50.3333	38.6667	82.6667	110.333	107.667	63								73.667	44.333	88.333	82.667	36	36	65	55.667	31.333	70.667	60.333	60	68.667	4.33333	2.66667	4.66667	0.666667	1.66667	15.6667
3	52	51.6667	98.6667	144.333	94.6667	47.3333								82.333	44.333	114.667	71	38.333	60.667	104.667	72	58.667	79.333	69	79.667	92	18	5.33333	1.33333	4	0	0
4	52.3333	46	98	147.333	118	92.6667								55	71.667	71.333	106.333	54.333	33.667	61.667	49.333	88.333	96.333	58.667	81.667	96.333	11.6667	3	5	19.3333	0	8
5	50.3333	40.3333	89.6667	138.333	148	72.3333								66.667	48	99.667	71.333	65.333	6.667	68.667	23.333	109.667	102.667	40	49.333	105	11	3.33333	6	5.33333	4	0
6	71.6667	45.3333	60	138.333	119.333	85.6667								84.333	68.333	90.333	80.333	55.333	7	74	68.667	63.333	97	43.333	57.333	46	3.66667	4.66667	6.66667	0	5.33333	5
7	68.6667	34	126	143	129	60.3333								86	84.667	131.333	56.667	57.667	19.333	78.667	68.667	73	79.333	64.667	24.333	77.333	17.6667	4	12	1.33333	9.33333	13.3333
