# Supplementary material for: BK channel properties correlate with neurobehavioral severity in three KCNMA1-linked channelopathy mouse models
Source: eLife. 2022 Jul 12;11:e77953. doi: 10.7554/eLife.77953 (PMC9275823; doi:10.7554/eLife.77953)
Supplement: Figure 6—source data 1. [file elife-77953-fig6-data1.xls]

## Sheet: Ai
WT	N999S/
	WT
3799.93	4887.18
4666.04	3916.49
5339.41	4734.47
5147.23	5199.06
6974.81	2375.16
7531.06	4361.35
7910.45	4371.13
2967.02	6638.03
3859.87	5457.27
8729.9	2409.1
5603.71	3244.04
	2601.84

## Sheet: Aii
WT	N999S/
	WT
50	54.5
51.5	54
49	52.5
49.5	67.5
58.5	30.5
64	51
58.5	52.5
45.5	50.5
57	59
65	38.5
45.5	50
	49.5

## Sheet: Aiii
WT	N999S/
	WT
8.96	6.01
5.58	5.94
3.62	5.91
5.29	4.46
2.44	8.86
7.48	4.59
3.87	3.65
7.21	2.69
9.51	4.86
4.95	6.98
4.05	10.18
	6.99

## Sheet: Aiv
WT	N999S/
	WT
38	43.5
48.5	52.5
55	48
41	51.5
49.5	50.5
31	63
37.5	70.5
49.5	48
35	56.5
28.5	61.5
44	37
	60

## Sheet: B
WT	N999S/
	WT
2656.33	2580.72
3604.78	3043.56
2619.46	2995.72
3766.58	3768.79
3197.34	2997.41
2491.73	3252.62
4138.8	3119.54
3507.63	3433.5

## Sheet: C
WT	N999S/
	WT
113	45.667
98.667	22.333
56.667	43.333
66	45.667
76.333	95
120	26.667
120	81.333
120	33
59.333	90.667
115.333	22.667
	24.333

## Sheet: D
	WT	WT	WT	WT	WT	WT	WT	WT	WT	WT	WT	WT	N999S/	N999S/	N999S/	N999S/	N999S/	N999S/	N999S/	N999S/	N999S/	N999S/	N999S/	N999S/
													WT	WT	WT	WT	WT	WT	WT	WT	WT	WT	WT	WT
	1	2	3	4	5	7	9	13	14	20	8	10	6	8	12	17	18	19	7	9	11	13	14
1	65.333	32.667	56	49.667	60.333	19.667	53	37.667	74	70.667	18.667	79.333	26.333	46.333	19.333	14	5.667	39	47	38.333	53.667	69.333	28.333
2	108.667	70.667	86.333	94.333	30	67.333	55.333	60.333	101.667	93.667	41	55.667	41.667	44	46	47	17.333	64.333	26	28	27	46.333	26
3	65.667	74.667	83	70.667	56.667	72	79.667	40.667	60	104.667	42	76	32.333	52.667	61.333	69.667	36.667	52.667	51.667	42.667	41.333	69	59.333
4	105.667	81.333	84.333	76.667	53	74	91.667	38	53.667	70.333	36	74.333	43	47.333	57.333	77	35	58.333	44.667	21.333	46	44.667	58.667
5	96.333	59	79.333	70.667	48.333	88	62	55.333	73.667	43.333	68.667	112	60	54.333	63.667	56.667	48	54.333	47	28.333	31.667	65	57
6	61	76.333	77.667	78.333	47.333	61	42.333	84.667	99.333	36	70.333	96	86.333	40	76.667	50.333	52	65.667	42	49.333	46.333	47.667	32.667
7	68.333	103.333	77.667	114.333	69.333	106.333	100	114.333	105.333	58.667	70	93.333	46	54	104.667	60.667	74.333	73.667	68.333	36.333	49	47.667	58
